# Supplementary material for: Neurocognitive Deficits in First-Episode and Chronic Psychotic Disorders: A Systematic Review from 2009 to 2022
Source: MDPI journal article supplement (doi:10.3390/brainsci13020299), 2023-02-10
Supplement: s1 [file s1]

## Supplementary material

| Author              | Patient Group        |              |              | Healthy Control Group |              |              |
|---------------------|----------------------|--------------|--------------|-----------------------|--------------|--------------|
|                     | Characteristics      | n (% female) | Age (SD)     | characteristics       | n (% female) | Age (SD)     |
| Al-Dujaili [1]      | CHS-NR               | 60 (37)      | 36.2 (12.3)  | HC                    | 43 (44)      | 33.2 (11.1)  |
|                     | CHS-PR               | 55 (27)      | 36.5 (9.5)   |                       |              |              |
| Al-Hakeim [2]       | CHS                  | 120 (40)     | 41.0 (9.6)   | HC                    | 54 (33.3)    | 37.9 (10.03) |
| Beck [3]            | CHS (Chinese sample) | 35 (54)      | 28.5         | HC (Chinese sample)   | 38 (46)      | 30.3         |
|                     | CHS (Danish sample)  | 31 (42)      | 25.1         | HC (Danish sample)    | 29 (45)      | 24.4         |
| Bliksted [4]        | FES                  | 36 (47)      | 22.7         | HC                    | 36 (47)      | 22.7         |
| Bosnjak Kuharic [5] | FEP                  | 129 (36)     | 24           | HC                    | 100 (54)     | 23           |
| Chattopadhyay [6]   | CHS                  | 34 (36)      | 30.9 (8.24)  | HC                    | 47 (11)      | 29.3 (7.91)  |
| Chen [7]            | FES                  | 42 (57)      | 25.2 (6.2)   | HC                    | 36 (42)      | 26.5 (4.4)   |
| Chen [8]            | FES                  | 50 (46)      | 22.3 (6.74)  | HC                    | 40 (43)      | 25.3 (6.79)  |
|                     | CHS                  | 158 (51)     | 28.3 (7.7)   |                       |              |              |
| Correa-Ghisays [9]  | CHS                  | 30 (23)      | 40.8 (10.7)  | HC                    | 28 (64)      | 36.6 (14.5)  |
| Cuesta [10]         | FEP                  | 50 (0.3)     | 25.5 (5.7)   | HC                    | 24 (0.25)    | 23.2 (5.7)   |
|                     |                      |              |              | S-FEP                 | 21           | 24.9 (6.6)   |
| Da Motta [11]       | CHS                  | 38 (18)      | 40.3 (12.51) | HC                    | 97 (54)      | 35.5 (10.59) |
| De la Torre [12]    | CHS                  | 97 (29)      | 40 (7.45)    | HC                    | 35 (69)      | 38.6 (17.98) |
| Eisenacher [13]     | HRP                  | 38 (34)      | 22.9 (4.17)  | HC                    | 38 (32)      | 24.3 (5.78)  |
| Ferretjans [14]     | CHS                  | 69 (38)      | 39.9 (11.8)  | HC                    | 43 (16)      | 41.5 (10.5)  |
| Frommann [15]       | HRP-early            | 116 (35)     | 25.6 (6.1)   | HC                    | 87 (44)      | 25.5 (4.4)   |
|                     | HRP-late             | 89 (40)      | 25.3 (6.4)   |                       |              |              |

|                                                  |         |          |             |    |          |              |
|--------------------------------------------------|---------|----------|-------------|----|----------|--------------|
| Giordano [16]                                    | CHS     | 114 (29) | 36.9 (9.39) | HC | 63 (49)  | 34.4 (12.48) |
| Guo [17]                                         | FES     | 51 (35)  | 22.5 (4.1)  | HC | 41 (42)  | 22.8 (3.9)   |
| Hájková [18]                                     | FEP     | 53 (36)  | 32 (7.69)   | HC | 49 (59)  | 29 (8.64)    |
| He [19]                                          | FEP     | 115 (54) | 25.3 (8.2)  | HC | 113 (50) | 26.6 (8.9)   |
| Konstantakopoulos [20]                           | CHS     | 54 (56)  | 41.6 (8.58) | HC | 53 (59)  | 43.4 (13.14) |
| Koshiyama [21]                                   | CHS     | 428 (28) | 45.5 (9.5)  | HC | 283 (51) | 44.5 (11.4)  |
| Li [22]                                          | HRP     | 34 (38)  | 21.5 (3.5)  | HC | 37 (51)  | 20.8 (3.1)   |
| Liu [23]                                         | HRP     | 73 (43)  | 23.3 (4.5)  | HC | 72 (40)  | 24.0 (2.9)   |
|                                                  | FES     | 44 (29)  | 23.5 (4.4)  |    |          |              |
|                                                  | CHS     | 34 (50)  | 27.1 (2.6)  |    |          |              |
| Liu [24]                                         | FES     | 31 (45)  | 25 (6.8)    | HC | 33 (52)  | 24.2 (5)     |
| Maes, Sirivichayakul, Kanchanatawan, et al. [25] | CHS-MR  | 40 (55)  | 40.9 (10.5) | HC | 40 (75)  | 37.4 (12.8)  |
|                                                  | CHS-NMR | 39 (36)  | 41.1 (11.7) |    |          |              |
| Maes, Sirivichayakul, Matsumoto, et al. [26]     | CHS-NOS | 39 (46)  | 39.5 (11.2) | HC | 40 (75)  | 37.4 (12.8)  |
|                                                  | CHS-OS  | 40 (45)  | 42.5 (10.8) |    |          |              |
| Maes [27]                                        | CHS-ND  | 40 (45)  | 41.3 (10.8) | HC | 40 (75)  | 37.4 (12.8)  |
|                                                  | CHS-D   | 40 (48)  | 40.9 (11.4) |    |          |              |
| Mançe Çalışır [28]                               | CHS     | 17 (52)  | 24.6 (3.20) | HC | 23 (43)  | 27.4 (4.09)  |
| McDonald [29]                                    | HRP     | 101 (76) | 22 (4.0)    | HC | 38 (68)  | 23.1         |
| Morales-Muñoz [30]                               | FEP     | 38 (18)  | 26.7 (2.39) | HC | 38 (61)  | 30.3 (0.95)  |
| Ngoma [31]                                       | FEP     | 188 (46) | 28.0 (7.1)  | HC | 153 (57) | 28.1 (7.1)   |
| Randers [32]                                     | HRP     | 50 (56)  | 23.6 (4.6)  | HC | 50 (56)  | 23.5 (4.4)   |
| Saleem [33]                                      | FEP     | 20 (20)  | 26.5 (4.3)  | HC | 15 (20)  | 23.8 (5.2)   |

|                         |                  |          |             |    |          |              |
|-------------------------|------------------|----------|-------------|----|----------|--------------|
| Service [34]            | CHS              | 160 (17) | 37.4 (12.8) | HC | 717 (63) | 36.7 (14.45) |
| Shi [35]                | CHS              | 230 (51) | 38.7 (11.5) | HC | 656 (50) | 39.3 (11.4)  |
| Tang [36]               | CHS-D            | 51       | 50.2 (6.85) | HC | 40       | 46.8 (10.73) |
|                         | CHS-ND           | 58       | 47.9 (6.84) |    |          |              |
| Vignapiano [37]         | CHS              | 145 (32) | 36.9 (9.49) | HC | 69 (44)  | 35.9 (12.79) |
| Wang [38]               | FES              | 81 (42)  | 30.4 (8.03) | HC | 73 (44)  | 32.5 (10.03) |
| Wu [39]                 | FES              | 79 (46)  | 25.7 (7.8)  | HC | 124 (48) | 44.7 (8.8)   |
|                         | CHS              | 132 (48) | 44.4 (8.7)  |    |          |              |
| Xiao [40]               | FES              | 58 (47)  | 25.0 (5.9)  | HC | 55 (40)  | 26.5 (6.6)   |
| Xiu [41]                | FES              | 45 (49)  | 24.1 (6.3)  | HC | 40 (60)  | 45.1 (12.8)  |
|                         | CHS              | 35 (49)  | 44.1 (11.2) |    |          |              |
| Yang [42]               | FES              | 21       | 30.2 (8.5)  | HC | 45 (51)  | 31.8 (8.1)   |
|                         | CHS              | 26       |             |    |          |              |
|                         | SZ (= FES + CHS) | 47 (49)  |             |    |          |              |
| Yang [43]               | FES              | 34 (44)  | 22.3 (5.21) | HC | 35 (54)  | 22.6 (1.77)  |
|                         | CHS              | 31 (48)  | 27.4 (3.71) |    |          |              |
| Yang [44]               | CHS              | 32 (50)  | 30.0 (8.5)  | HC | 30 (53)  | 33.5 (9.1)   |
| Zhang [45]              | FES              | 77 (48)  | 29.2 (9.6)  | HC | 75 (43)  | 28.7 (9.1)   |
| Zhang [46]              | FES              | 32 (31)  | 22.7 (4.0)  | HC | 29 (41)  | 22.1 (3.6)   |
| Zhao [47]               | FES-R            | 65 (46)  | 29.3 (10.0) | HC | 58 (36)  | 31.4 (12.0)  |
|                         | FES-NR           | 45 (42)  | 31.6 (13.4) |    |          |              |
| Zhou, Tang, et al. [48] | CHS-D            | 33 (0)   | 48.7 (7.68) | HC | 40 (0)   | 46 (9.47)    |
|                         | CHS-ND           | 41 (0)   | 46 (5.35)   |    |          |              |
| Zhou, Yu, et al. [49]   | CHS-D            | 37 (0)   | 49 (7.43)   | HC | 38 (0)   | 46.1 (9.11)  |
|                         | CHS-ND           | 38 (0)   | 45.9 (5.54) |    |          |              |
| Zhou [50]               | CHS-D            | 58 (0)   | 51.5 (9.99) | HC | 113 (0)  | 50.8 (7.77)  |
|                         | CHS-ND           | 93 (0)   | 51.3 (8.84) |    |          |              |

|           |     |         |            |    |         |             |
|-----------|-----|---------|------------|----|---------|-------------|
| Zong [51] | FES | 42 (36) | 24.9 (4.8) | HC | 38 (34) | 24.8 (4.56) |
|-----------|-----|---------|------------|----|---------|-------------|

**Table S1. Study populations characteristics:** CHS: chronic schizophrenia, CHS-D: deficit chronic schizophrenia as defined by stable negative symptoms, CHS-ND: non-deficit chronic schizophrenia, CHS-NMR: chronic schizophrenia without motor retardation, CHS-NR: chronic schizophrenia treatment-non-responders, CHS-MR: chronic schizophrenia with motor retardation, CHS-NOS: chronic schizophrenia without oxidative stress, CHS-OS: chronic schizophrenia with oxidative stress, CHS-PR: chronic schizophrenia treatment-partial-responders, HC: healthy controls, HRP: high risk of psychotic disorder, HRP-early: early stages of high risk for psychotic disorder, HRP-late: late stages of high risk of psychotic disorder, FEP: first-episode psychotic disorder, S-FEP: siblings of first-episode patients, FES: first-episode schizophrenia, FES-NR: non-remitted first-episode schizophrenia, FES-R: remitted first-episode schizophrenia, SZ: schizophrenic patients.

## References:

1. Al-Dujaili, A.H.; Mousa, R.F.; Al-Hakeim, H.K.; Maes, M. High Mobility Group Protein 1 and Dickkopf-Related Protein 1 in Schizophrenia and Treatment-Resistant Schizophrenia: Associations With Interleukin-6, Symptom Domains, and Neurocognitive Impairments. *Schizophr Bull* **2021**, *47*, 530-541, doi:10.1093/schbul/sbaa136.
2. Al-Hakeim, H.K.; Almulla, A.F.; Maes, M. The Neuroimmune and Neurotoxic Fingerprint of Major Neurocognitive Psychosis or Deficit Schizophrenia: a Supervised Machine Learning Study. *Neurotoxicity research* **2020**, *37*, 753-771, doi:10.1007/s12640-019-00112-z.
3. Beck, K.I.; Simonsen, A.; Wang, H.; Yang, L.; Zhou, Y.; Bliksted, V. Cross-cultural comparison of theory of mind deficits in patients with schizophrenia from China and Denmark: different aspects of ToM show different results. *Nordic journal of psychiatry* **2020**, *74*, 366-373, doi:10.1080/08039488.2020.1723687.
4. Bliksted, V.; Fagerlund, B.; Weed, E.; Frith, C.; Videbech, P. Social cognition and neurocognitive deficits in first-episode schizophrenia. *Schizophr Res* **2014**, *153*, 9-17, doi:10.1016/j.schres.2014.01.010.
5. Bosnjak Kuharic, D.; Makaric, P.; Kekin, I.; Rossini Gajsak, L.; Zivkovic, M.; Ostojic, D.; Silic, A.; Bajic, Z.; Lukacevic Lovrencic, I.; Beezhold, J.; et al. Changes of neurocognitive status in patients with the first-episode psychosis after 18 months of treatment-A prospective cohort study. *Psychiatry research* **2021**, *304*, 114131, doi:10.1016/j.psychres.2021.114131.
6. Chattopadhyay, S.; Patil, N.M.; Nayak, R.B.; Chate, S.S.; Singh, O.P. Neurocognitive Profile in Indian Individuals Genetically at Risk of Schizophrenia. *Indian journal of psychological medicine* **2020**, *42*, 155-161, doi:10.4103/ijpsym.ijpsym\_243\_19.
7. Chen, S.; Tian, L.; Chen, N.; Xiu, M.H.; Wang, Z.R.; Wang, Y.C.; Tan, Y.L.; Wang, C.Y. More dampened monocytic Toll-like receptor 4 response to lipopolysaccharide and its association with cognitive function in Chinese Han first-episode patients with schizophrenia. *Schizophr Res* **2019**, *206*, 300-306, doi:10.1016/j.schres.2018.11.001.
8. Chen, S.; Liu, Y.; Liu, D.; Zhang, G.; Wu, X. The difference of social cognitive and neurocognitive performance between patients with schizophrenia at different stages and influencing factors. *Schizophrenia Research: Cognition* **2021**, *24*, 100195, doi:10.1016/j.scog.2021.100195.
9. Correa-Ghisays, P.; Sánchez-Ortí, J.V.; Balanzá-Martínez, V.; Selva-Vera, G.; Vila-Francés, J.; Magdalena-Benedito, R.; Victor, V.M.; Escribano-López, I.; Hernández-Mijares, A.; Vivas-Lalinde, J.; et al. Transdiagnostic neurocognitive deficits in patients with type 2 diabetes

- mellitus, major depressive disorder, bipolar disorder, and schizophrenia: A 1-year follow-up study. *J Affect Disord* **2022**, *300*, 99-108, doi:10.1016/j.jad.2021.12.074.
10. Cuesta, M.J.; Moreno-Izco, L.; Ribeiro, M.; López-Ilundain, J.M.; Lecumberri, P.; Cabada, T.; Lorente-Omeñaca, R.; Sánchez-Torres, A.M.; Gómez, M.S.; Peralta, V. Motor abnormalities and cognitive impairment in first-episode psychosis patients, their unaffected siblings and healthy controls. *Schizophr Res* **2018**, *200*, 50-55, doi:10.1016/j.schres.2017.10.035.
11. da Motta, C.; Pato, M.T.; Barreto Carvalho, C.; Castilho, P. The neurocognitive and functional profile of schizophrenia in a genetically homogenous European sample. *Psychiatry research* **2021**, *304*, 114140, doi:10.1016/j.psychres.2021.114140.
12. De la Torre, G.G.; Doval, S.; López-Sanz, D.; García-Sedeño, M.; Ramallo, M.A.; Bernal, M.; González-Torre, S. Neurocognitive Impairment in Severe Mental Illness. Comparative study with Spanish Speaking Patients. *Brain sciences* **2021**, *11*, doi:10.3390/brainsci11030389.
13. Eisenacher, S.; Rausch, F.; Ainser, F.; Englisch, S.; Becker, A.; Mier, D.; Fenske, S.; Meyer-Lindenberg, A.; Kirsch, P.; Zink, M. Early cognitive basic symptoms are accompanied by neurocognitive impairment in patients with an 'at-risk mental state' for psychosis. *Early intervention in psychiatry* **2018**, *12*, 586-595, doi:10.1111/eip.12350.
14. Ferretjans, R.; de Souza, R.P.; Panizzutti, B.; Ferrari, P.; Mantovani, L.; de Campos-Carli, S.M.; Santos, R.R.; Guimarães, F.C.; Teixeira, A.L.; Gama, C.S.; et al. Cannabinoid receptor gene polymorphisms and cognitive performance in patients with schizophrenia and controls. *Revista brasileira de psiquiatria (Sao Paulo, Brazil : 1999)* **2022**, *44*, 26-34, doi:10.1590/1516-4446-2020-1650.
15. Frommann, I.; Pukrop, R.; Brinkmeyer, J.; Bechdorf, A.; Ruhrmann, S.; Berning, J.; Decker, P.; Riedel, M.; Möller, H.J.; Wölwer, W.; et al. Neuropsychological profiles in different at-risk states of psychosis: executive control impairment in the early--and additional memory dysfunction in the late--prodromal state. *Schizophr Bull* **2011**, *37*, 861-873, doi:10.1093/schbul/sbp155.
16. Giordano, G.M.; Perrottelli, A.; Mucci, A.; Di Lorenzo, G.; Altamura, M.; Bellomo, A.; Brugnoli, R.; Corrivetti, G.; Girardi, P.; Monteleone, P.; et al. Investigating the Relationships of P3b with Negative Symptoms and Neurocognition in Subjects with Chronic Schizophrenia. *Brain sciences* **2021**, *11*, doi:10.3390/brainsci11121632.
17. Guo, X.; Li, J.; Wang, J.; Fan, X.; Hu, M.; Shen, Y.; Chen, H.; Zhao, J. Hippocampal and orbital inferior frontal gray matter volume abnormalities and cognitive deficit in treatment-naive, first-episode patients with schizophrenia. *Schizophr Res* **2014**, *152*, 339-343, doi:10.1016/j.schres.2013.12.015.
18. Hájková, M.; Knížková, K.; Siroňová, A.; Keřková, B.; Jonáš, J.; Šustová, P.; Dorazilová, A.; Rodriguez, M. Cognitive performance and lifetime cannabis use in patients with first-episode schizophrenia spectrum disorder. *Cogn Neuropsychiatry* **2021**, *26*, 257-272, doi:10.1080/13546805.2021.1924649.
19. He, Z.; Deng, W.; Li, M.; Chen, Z.; Jiang, L.; Wang, Q.; Huang, C.; Collier, D.A.; Gong, Q.; Ma, X.; et al. Aberrant intrinsic brain activity and cognitive deficit in first-episode treatment-naive patients with schizophrenia. *Psychol Med* **2013**, *43*, 769-780, doi:10.1017/s0033291712001638.
20. Konstantakopoulos, G.; Ioannidi, N.; Psarros, C.; Patrikelis, P.; Stefanatou, P.; Kravariti, E. The impact of neurocognition on mentalizing in euthymic bipolar disorder versus schizophrenia. *Cogn Neuropsychiatry* **2020**, *25*, 405-420, doi:10.1080/13546805.2020.1829579.
21. Koshiyama, D.; Miyakoshi, M.; Thomas, M.L.; Joshi, Y.B.; Molina, J.L.; Tanaka-Koshiyama, K.; Sprock, J.; Braff, D.L.; Swerdlow, N.R.; Light, G.A. Unique contributions of sensory discrimination and gamma synchronization deficits to cognitive, clinical, and psychosocial functional impairments in schizophrenia. *Schizophr Res* **2021**, *228*, 280-287, doi:10.1016/j.schres.2020.12.042.
22. Li, R.R.; Lyu, H.L.; Liu, F.; Lian, N.; Wu, R.R.; Zhao, J.P.; Guo, W.B. Altered functional connectivity strength and its correlations with cognitive function in subjects with ultra-high

- risk for psychosis at rest. *CNS neuroscience & therapeutics* **2018**, *24*, 1140-1148, doi:10.1111/cns.12865.
23. Liu, Y.; Wang, G.; Jin, H.; Lyu, H.; Liu, Y.; Guo, W.; Shi, C.; Meyers, J.; Wang, J.; Zhao, J.; et al. Cognitive deficits in subjects at risk for psychosis, first-episode and chronic schizophrenia patients. *Psychiatry research* **2019**, *274*, 235-242, doi:10.1016/j.psychres.2019.01.089.
  24. Liu, Y.; Bi, T.; Zhang, B.; Kuang, Q.; Li, H.; Zong, K.; Zhao, J.; Ning, Y.; She, S.; Zheng, Y. Face and object visual working memory deficits in first-episode schizophrenia correlate with multiple neurocognitive performances. *Gen Psychiatr* **2021**, *34*, e100338, doi:10.1136/gpsych-2020-100338.
  25. Maes, M.; Sirivichayakul, S.; Kanchanatawan, B.; Carvalho, A.F. In schizophrenia, psychomotor retardation is associated with executive and memory impairments, negative and psychotic symptoms, neurotoxic immune products and lower natural IgM to malondialdehyde. *The world journal of biological psychiatry : the official journal of the World Federation of Societies of Biological Psychiatry* **2020**, *21*, 383-401, doi:10.1080/15622975.2019.1701203.
  26. Maes, M.; Sirivichayakul, S.; Matsumoto, A.K.; Michelin, A.P.; de Oliveira Semeão, L.; de Lima Pedrão, J.V.; Moreira, E.G.; Barbosa, D.S.; Carvalho, A.F.; Solmi, M.; et al. Lowered Antioxidant Defenses and Increased Oxidative Toxicity Are Hallmarks of Deficit Schizophrenia: a Nomothetic Network Psychiatry Approach. *Molecular neurobiology* **2020**, *57*, 4578-4597, doi:10.1007/s12035-020-02047-5.
  27. Maes, M.; Kanchanatawan, B. In (deficit) schizophrenia, a general cognitive decline partly mediates the effects of neuro-immune and neuro-oxidative toxicity on the symptomatology and quality of life. *CNS spectrums* **2021**, 1-10, doi:10.1017/s1092852921000419.
  28. Mançe Çalışır, Ö.; Atbaşoğlu, E.C.; Devrimci Özgüven, H.; Ölmez, Ş. Cognitive Features of High-functioning Adults with Autism and Schizophrenia Spectrum Disorders. *Türk psikiyatri dergisi = Turkish journal of psychiatry* **2018**, *29*, 1-10.
  29. McDonald, M.; Christoforidou, E.; Van Rijsbergen, N.; Gajwani, R.; Gross, J.; Gumley, A.I.; Lawrie, S.M.; Schwannauer, M.; Schultze-Lutter, F.; Uhlhaas, P.J. Using Online Screening in the General Population to Detect Participants at Clinical High-Risk for Psychosis. *Schizophr Bull* **2019**, *45*, 600-609, doi:10.1093/schbul/sby069.
  30. Morales-Muñoz, I.; Jurado-Barba, R.; Fernández-Guinea, S.; Álvarez-Alonso, M.J.; Rodríguez-Jiménez, R.; Jiménez-Arriero, M.A.; Rubio, G. Cognitive impairments in patients with first episode psychosis: The relationship between neurophysiological and neuropsychological assessments. *Journal of clinical neuroscience : official journal of the Neurosurgical Society of Australasia* **2017**, *36*, 80-87, doi:10.1016/j.jocn.2016.10.023.
  31. Ngoma, M.; Vansteelandt, K.; Delespaul, P.; Krabbendam, L.; Miezi, S.M.; Peuskens, J. Cognitive deficits in nonaffective functional psychoses: a study in the Democratic Republic of Congo. *Psychiatry research* **2010**, *180*, 86-92, doi:10.1016/j.psychres.2009.10.007.
  32. Randers, L.; Jepsen, J.R.M.; Fagerlund, B.; Nordholm, D.; Krakauer, K.; Hjorthøj, C.; Glenthøj, B.; Nordentoft, M. Generalized neurocognitive impairment in individuals at ultra-high risk for psychosis: The possible key role of slowed processing speed. *Brain and Behavior* **2021**, *11*, e01962, doi:10.1002/brb3.1962.
  33. Saleem, M.M.; Harte, M.K.; Marshall, K.M.; Scally, A.; Brewin, A.; Neill, J.C. First episode psychosis patients show impaired cognitive function--a study of a South Asian population in the UK. *Journal of psychopharmacology (Oxford, England)* **2013**, *27*, 366-373, doi:10.1177/0269881113477746.
  34. Service, S.K.; Vargas Upegui, C.; Castaño Ramírez, M.; Port, A.M.; Moore, T.M.; Munoz Umanes, M.; Agudelo Arango, L.G.; Díaz-Zuluaga, A.M.; Melo Espejo, J.; López, M.C.; et al. Distinct and shared contributions of diagnosis and symptom domains to cognitive performance in severe mental illness in the Paisa population: a case-control study. *The lancet. Psychiatry* **2020**, *7*, 411-419, doi:10.1016/s2215-0366(20)30098-5.

35. Shi, C.; Kang, L.; Yao, S.; Ma, Y.; Li, T.; Liang, Y.; Cheng, Z.; Xu, Y.; Shi, J.; Xu, X.; et al. What is the optimal neuropsychological test battery for schizophrenia in China? *Schizophr Res* **2019**, *208*, 317-323, doi:10.1016/j.schres.2019.01.034.
36. Tang, X.; Zhou, C.; Gao, J.; Duan, W.; Yu, M.; Xiao, W.; Zhang, X.; Dong, H.; Wang, X.; Zhang, X. Serum BDNF and GDNF in Chinese male patients with deficit schizophrenia and their relationships with neurocognitive dysfunction. *BMC psychiatry* **2019**, *19*, 254, doi:10.1186/s12888-019-2231-3.
37. Vignapiano, A.; Koenig, T.; Mucci, A.; Giordano, G.M.; Amodio, A.; Altamura, M.; Bellomo, A.; Brugnoli, R.; Corrivetti, G.; Di Lorenzo, G.; et al. Disorganization and cognitive impairment in schizophrenia: New insights from electrophysiological findings. *Int. J. Psychophysiol.* **2019**, *145*, 99-108, doi:10.1016/j.ijpsycho.2019.03.008.
38. Wang, M.Y.; Ho, N.F.; Sum, M.Y.; Collinson, S.L.; Sim, K. Impact of duration of untreated psychosis and premorbid intelligence on cognitive functioning in patients with first-episode schizophrenia. *Schizophr Res* **2016**, *175*, 97-102, doi:10.1016/j.schres.2016.04.002.
39. Wu, J.Q.; Chen, D.C.; Tan, Y.L.; Xiu, M.H.; De Yang, F.; Soares, J.C.; Zhang, X.Y. Cognitive impairments in first-episode drug-naïve and chronic medicated schizophrenia: MATRICS consensus cognitive battery in a Chinese Han population. *Psychiatry research* **2016**, *238*, 196-202, doi:10.1016/j.psychres.2016.02.042.
40. Xiao, W.; Ye, F.; Liu, C.; Tang, X.; Li, J.; Dong, H.; Sha, W.; Zhang, X. Cognitive impairment in first-episode drug-naïve patients with schizophrenia: Relationships with serum concentrations of brain-derived neurotrophic factor and glial cell line-derived neurotrophic factor. *Progress in neuro-psychopharmacology & biological psychiatry* **2017**, *76*, 163-168, doi:10.1016/j.pnpbp.2017.03.013.
41. Xiu, M.-H.; Wang, D.; Chen, S.; Du, X.-D.; Chen, D.-C.; Chen, N.; Wang, Y.-C.; Yin, G.; Zhang, Y.; Tan, Y.-L.; et al. Interleukin-3, symptoms and cognitive deficits in first-episode drug-naïve and chronic medicated schizophrenia. *Psychiatry research* **2018**, *263*, 147-153, doi:10.1016/j.psychres.2018.02.054.
42. Yang, Y.J.; Xiong, J.W.; Zhao, Y.; Zhan, J.Q.; Chen, H.B.; Yan, K.; Hu, M.R.; Yu, B.; Wei, B. Increased plasma asymmetric dimethylarginine is associated with cognitive deficits in patients with schizophrenia. *Psychiatry research* **2016**, *246*, 480-484, doi:10.1016/j.psychres.2016.10.015.
43. Yang, Y.; Liu, Y.; Wang, G.; Hei, G.; Wang, X.; Li, R.; Li, L.; Wu, R.; Zhao, J. Brain-derived neurotrophic factor is associated with cognitive impairments in first-episode and chronic schizophrenia. *Psychiatry research* **2019**, *273*, 528-536, doi:10.1016/j.psychres.2019.01.051.
44. Yang, Y.J.; Luo, T.; Zhao, Y.; Jiang, S.Z.; Xiong, J.W.; Zhan, J.Q.; Yu, B.; Yan, K.; Wei, B. Altered insulin-like growth factor-2 signaling is associated with psychopathology and cognitive deficits in patients with schizophrenia. *PLoS One* **2020**, *15*, e0226688, doi:10.1371/journal.pone.0226688.
45. Zhang, X.Y.; Tang, W.; Xiu, M.H.; Chen, D.C.; Yang, F.D.; Tan, Y.L.; Wang, Z.R.; Zhang, F.; Liu, J.; Liu, L.; et al. Interleukin 18 and cognitive impairment in first episode and drug naïve schizophrenia versus healthy controls. *Brain, behavior, and immunity* **2013**, *32*, 105-111, doi:10.1016/j.bbi.2013.03.001.
46. Zhang, X.; Yao, J.; Lv, Y.; Zhao, X.; Li, Y.; Sui, Y.; Zhiping, D. An Association Study on the Cognitive Function and the Cerebral Grey Matter Volume of Patients with First-Episode Schizophrenia. *Shanghai Arch Psychiatry* **2018**, *30*, 154-167, doi:10.11919/j.issn.1002-0829.217138.
47. Zhao, Y.; Xiao, W.; Chen, K.; Zhan, Q.; Ye, F.; Tang, X.; Zhang, X. Neurocognition and social cognition in remitted first-episode schizophrenia: correlation with VEGF serum levels. *BMC psychiatry* **2019**, *19*, 403, doi:10.1186/s12888-019-2397-8.
48. Zhou, C.; Tang, X.; You, W.; Wang, X.; Zhang, X.; Zhang, X.; Yu, M. Altered Patterns of the Fractional Amplitude of Low-Frequency Fluctuation and Functional Connectivity Between Deficit and Non-Deficit Schizophrenia. *Front Psychiatry* **2019**, *10*, 680, doi:10.3389/fpsy.2019.00680.

49. Zhou, C.; Yu, M.; Tang, X.; Wang, X.; Zhang, X.; Zhang, X.; Chen, J. Convergent and divergent altered patterns of default mode network in deficit and non-deficit schizophrenia. *Progress in neuro-psychopharmacology & biological psychiatry* **2019**, *89*, 427-434, doi:10.1016/j.pnpbp.2018.10.012.
50. Zhou, C.; Xue, C.; Chen, J.; Amdanee, N.; Tang, X.; Zhang, H.; Zhang, F.; Zhang, X.; Zhang, C. Altered Functional Connectivity of the Nucleus Accumbens Network Between Deficit and Non-deficit Schizophrenia. *Frontiers in Psychiatry* **2021**, *12*, doi:10.3389/fpsyt.2021.704631.
51. Zong, X.; Zhang, Q.; He, C.; Huang, X.; Zhang, J.; Wang, G.; Lv, L.; Sang, D.; Zou, X.; Chen, H.; et al. DNA Methylation Basis in the Effect of White Matter Integrity Deficits on Cognitive Impairments and Psychopathological Symptoms in Drug-Naive First-Episode Schizophrenia. *Front Psychiatry* **2021**, *12*, 777407, doi:10.3389/fpsyt.2021.777407.
